# Supplementary material for: Primary Treatment Effects for High-Grade Serous Ovarian Carcinoma Evaluated by Changes in Serum Metabolites and Lipoproteins
Source: MDPI journal article supplement (doi:10.3390/metabo13030417), 2023-03-12
Supplement: s1 [file s1]

# Primary treatment effects for high-grade serous ovarian carcinoma evaluated by changes in serum metabolites and lipoproteins

Cecilie Fredvik Torkildsen <sup>1,2</sup>, Marie Austdal <sup>3</sup>, Ann-Charlotte Iversen <sup>4,5</sup>, Tone Frost Bathen <sup>6</sup>, Guro Fanneløb Giskeødegård <sup>7</sup>, Elisabeth Berge Nilsen <sup>1</sup>, Grete Alræk Iversen <sup>8</sup>, Ragnar Kvie Sande <sup>1,9</sup>, Line Bjørge<sup>2,8</sup> and Liv Cecilie Vestrheim Thomsen <sup>2,8,\*</sup>

<sup>1</sup> Department of Obstetrics and Gynecology, Stavanger University Hospital, 4068 Stavanger, Norway; cecilie.torkildsen@uib.no (C.F.T.)

<sup>2</sup> Centre for Cancer Biomarkers CCBIO, Dept of Clinical Science, University of Bergen, 5020 Bergen, Norway

<sup>3</sup> Department of Research, Stavanger University Hospital, 4068 Stavanger, Norway

<sup>4</sup> Centre of Molecular Inflammation Research (CEMIR) and Department of Clinical and Molecular Medicine, Norwegian University of Science and Technology (NTNU), 7491 Trondheim, Norway

<sup>5</sup> Department of Gynecology and Obstetrics, St. Olavs Hospital, Trondheim University Hospital, 7006 Trondheim, Norway

<sup>6</sup> Department of Circulation and Medical Imaging, Norwegian University of Science and Technology, 7491 Trondheim, Norway

<sup>7</sup> K.G. Jebsen Center for Genetic Epidemiology, Department of Public Health and Nursing, Norwegian University of Science and Technology (NTNU), 7491 Trondheim, Norway

<sup>8</sup> Department of Obstetrics and Gynecology, Haukeland University Hospital, 5021 Bergen, Norway

<sup>9</sup> Department of clinical science, University of Bergen, 5020 Bergen, Norway

\* Correspondence: [liv.vestrheim@uib.no](mailto:liv.vestrheim@uib.no) (L.C.V.T.)

## Supplementary Methods

### *The IMPACT trial: Inclusion and exclusion criteria*

Exclusion criteria were the inability to receive oral medication, allergies to the study drugs, recent treatment for another malignancy, active liver disease or HIV, and/or the inability to understand a written informed consent document.

### *Lipoprotein metabolite analysis using NMR*

The density range of lipoprotein subfractions is continuous, and the subfractions referred to in this manuscript correspond to the density ranges as defined in protocols from Bruker BioSpin: LDL1: 1.019-1.031 kg/L, LDL2: 1.031-1.034 kg/L, LDL3: 1.034-1.037 kg/L, LDL4: 1.037-1.040 kg/L, LDL5: 1.040-1.044 kg/L, and LDL6: 1.044-1.063 kg/L. HDL1: 1.063-1.100 kg/L, HDL2: 1.100-1.112 kg/L, HDL3: 1.112-1.125 kg/L, and HDL4: 1.125-1.210 kg/L.

### *NMR buffer composition*

The serum buffer was prepared as follows: i) Dissolved 10.05 g Na<sub>2</sub>HPO<sub>4</sub>•7H<sub>2</sub>O in 380 mL H<sub>2</sub>O; ii) added 0.4 g TSP; iii) mixed well by ultrasonic mixing; iv) added 5 mL of a 4% NaN<sub>3</sub>/H<sub>2</sub>O solution; v) adjusted pH to 7.4 with 1M HCl (1M NaOH); vi) added H<sub>2</sub>O until total volume is 400 mL; vii) added 100 mL D<sub>2</sub>O and mixed well.

### *Differences between the different sites of sampling*

The patients were recruited from two sites: Haukeland University Hospital, Bergen, Norway and Stavanger University Hospital, Stavanger, Norway. Potential systematic differences between the two sites were explored by LMM analyses and RM-ASCA analyses of the metabolites and lipoproteins at all time points. No significant differences were found (data not shown).

### *RM-ASCA+ analysis, extended information*

RM-ASCA+ allows the effect matrices from LMM to be analyzed either separately or combined. Alternatively, the effect matrix combining group+time\*group interaction can be analyzed to display possible baseline differences between the groups together with their development over time compared to the reference group. An effect matrix combining "time+group+time\*group interaction" will show the time development of all groups, including the reference group, and display possible baseline differences between them in one plot.

## Supplementary Tables

**Table S1.** Patient characteristics.

|                                    | All<br>(n = 24)   | Arm I<br>(n = 15) | Arm II<br>(n = 9) | p-value<br>(Arm I vs.<br>Arm II) |
|------------------------------------|-------------------|-------------------|-------------------|----------------------------------|
| Age in years                       | 67.3 (54-85)      | 64.2 (54-78)      | 72.6 (56-85)      | 0.045                            |
| Stage (FIGO 2014)                  |                   |                   |                   | 0.435                            |
| Stage 2                            | 1                 | 1                 | 0                 |                                  |
| Stage 3                            | 17                | 11                | 6                 |                                  |
| Stage 4                            | 6                 | 3                 | 3                 |                                  |
| gBRCA mut (% tested)               | 1 (96%)           | 0 (100%)          | 0 (89%)           |                                  |
| sBRCA mut (% tested)               | 0 (46%)           | 0 (53%)           | 0 (33%)           |                                  |
| NACT                               | 9                 | 0                 | 9                 |                                  |
| Primary surgery                    | 15/24             |                   |                   |                                  |
| R0                                 | 7                 | 7                 | NA                |                                  |
| R1                                 | 1                 | 1                 | NA                |                                  |
| R2                                 | 7                 | 7                 | NA                |                                  |
| BMI (m2/kg)                        | 25 (18-32)        | 25 (21-26)        | 23 (18-27)        | 0.404                            |
| CA125 (kU/L)                       | 876 (34-2332)     | 897 (34-2332)     | 837 (138-1372)    | 0.471                            |
| ECOG Score:                        |                   |                   |                   | 0.002                            |
| ECOG 0                             | 11                | 10                | 1                 |                                  |
| ECOG 1                             | 11                | 5                 | 6                 |                                  |
| ECOG2                              | 2                 | 0                 | 2                 |                                  |
| Surgical complexity score          | 3.1 (0-6)         | 3.9 (1-7)         | 1.6 (0-3)         | 0.001                            |
| Comorbidities (%)                  |                   |                   |                   | 0.184                            |
| None                               | 8                 | 7                 | 1                 |                                  |
| Cardiovascular                     | 5                 | 3                 | 3                 |                                  |
| Other                              | 11                | 5                 | 5                 |                                  |
| Cholesterol-reducing drug (%)      |                   |                   |                   | 0.603                            |
| Yes                                | 6                 | 4                 | 2                 |                                  |
| No                                 | 18                | 11                | 7                 |                                  |
| Albumin (g/L)                      | 38.8              | 40.4              | 36.2              | 0.170                            |
| Hemoglobin (g/dL)                  | 13.2              | 13.7              | 12.2              | 0.017                            |
| Platelets (10*9/L)                 | 387               | 342               | 461               | 0.079                            |
| Evaluation <sup>a</sup> (visit 13) |                   |                   |                   | 0.068                            |
| Complete response                  | 9                 | 8                 | 1                 |                                  |
| Partial response                   | 11                | 6                 | 6                 |                                  |
| Stable disease                     | 1                 | 1                 | 0                 |                                  |
| N/A                                | 2                 | 0                 | 1                 |                                  |
| Death                              | 1                 | 0                 | 1                 |                                  |
| PFS (months) % reached             | 19<br>14.9 (1-39) | 11<br>17.6 (7-37) | 8<br>10.1 (1-16)  | 0.006                            |
| OS (months) % reached              | 8<br>22 (1-41)    | 3<br>31 (18-40)   | 5<br>14 (1-27)    | 0.089                            |

Data are shown as number of patients in the respective cohorts otherwise as mean (min-max).

PCS; Primary cytoreductive surgery, FIGO 2014; The international Federation of Gynecology and Obstetrics staging consensus from 2014, gBRCA mut; genetic BRCA 1/2 mutation, sBRCA mut; somatic BRCA 1/2 mutation, R0; Complete cytoreductive surgery (no residual tumor tissue after surgery), R1; Optimal cytoreductive surgery (residual tumor ≤ 1 cm), R2; Suboptimal cytoreductive surgery (residual tumor > 2 cm), ECOG; Eastern Cooperative Oncology Group Performance status, PFS; Progression-free survival, OS; overall survival, NA; not applicable.

\*RECIST criteria supplemented by CA125 response and progression criteria developed by the Gynecologic Cancer InterGroup. CA125 progression has been integrated with objective criteria into a composite definition of progression often used in the frontline setting.

**Table S2.** Overview of lipoproteins in the NMR panel.

| <b>Main parameters</b>            |        | Unit  |                            |
|-----------------------------------|--------|-------|----------------------------|
| TPTG                              |        | mg/dL | Triglycerides              |
| TPCH                              |        | mg/dL | Cholesterol                |
| LDCH                              |        | mg/dL | LDL Cholesterol            |
| HDCH                              |        | mg/dL | HDL Cholesterol            |
| TPA1                              |        | mg/dL | Apo-A1                     |
| TPA2                              |        | mg/dL | Apo-A2                     |
| TPAB                              |        | mg/dL | Apo-B100                   |
| <b>Calculated figures</b>         |        |       |                            |
| LDHD                              |        |       | LDL Cholesterol / HDL      |
| ABA1                              |        |       | Apo-A1/Apo-B100            |
| TBPN                              |        |       | Total ApoB Particle number |
| VLPN                              | nmol/L |       | VLDL particle number       |
| IDPN                              | nmol/L |       | IDL particle number        |
| LDPN                              | nmol/L |       | LDL particle number        |
| L1PN                              | nmol/L |       | LDL-1 particle number      |
| L2PN                              | nmol/L |       | LDL-2 particle number      |
| L3PN                              | nmol/L |       | LDL-3 particle number      |
| L4PN                              | nmol/L |       | LDL-4 particle number      |
| L5PN                              | nmol/L |       | LDL-5 particle number      |
| L6PN                              | nmol/L |       | LDL-6 particle number      |
| <b>Lipoprotein main fractions</b> |        |       |                            |
| VLTG                              | mg/dL  |       | Triglycerides, VLDL        |
| IDTG                              | mg/dL  |       | Triglycerides, IDL         |
| LDTG                              | mg/dL  |       | Triglycerides, LDL         |
| HDTG                              | mg/dL  |       | Triglycerides, HDL         |
| VLCH                              | mg/dL  |       | Cholesterol, VLDL          |
| IDCH                              | mg/dL  |       | Cholesterol, IDL           |
| VLFC                              | mg/dL  |       | Free cholesterol, VLDL     |
| IDFC                              | mg/dL  |       | Free cholesterol, IDL      |
| LDFC                              | mg/dL  |       | Free cholesterol, LDL      |
| HDFC                              | mg/dL  |       | Free cholesterol, HDL      |
| VLPL                              | mg/dL  |       | Phospholipids, VLDL        |
| IDPL                              | mg/dL  |       | Phospholipids, IDL         |
| LDPL                              | mg/dL  |       | Phospholipids, LDL         |
| HDPL                              | mg/dL  |       | Phospholipids, HDL         |
| HDA1                              | mg/dL  |       | Apo-A1, HDL                |
| HDA2                              | mg/dL  |       | Apo-A2, HDL                |
| VLAB                              | mg/dL  |       | Apo-B, VLDL                |
| IDAB                              | mg/dL  |       | Apo-B, IDL                 |
| LDAB                              | mg/dL  |       | Apo-B, LDL                 |
| <b>VLDL subfractions</b>          |        |       |                            |
| V1TG                              | mg/dL  |       | Triglycerides, VLDL-1      |
| V2TG                              | mg/dL  |       | Triglycerides, VLDL-2      |
| V3TG                              | mg/dL  |       | Triglycerides, VLDL-3      |
| V4TG                              | mg/dL  |       | Triglycerides, VLDL-4      |
| V5TG                              | mg/dL  |       | Triglycerides, VLDL-5      |
| V1CH                              | mg/dL  |       | Cholesterol, VLDL-1        |

|                         |       |                          |
|-------------------------|-------|--------------------------|
| V2CH                    | mg/dL | Cholesterol, VLDL-2      |
| V3CH                    | mg/dL | Cholesterol, VLDL-3      |
| V4CH                    | mg/dL | Cholesterol, VLDL-4      |
| V5CH                    | mg/dL | Cholesterol, VLDL-5      |
| V1FC                    | mg/dL | Free Cholesterol, VLDL-1 |
| V2FC                    | mg/dL | Free Cholesterol, VLDL-2 |
| V3FC                    | mg/dL | Free Cholesterol, VLDL-3 |
| V4FC                    | mg/dL | Free Cholesterol, VLDL-4 |
| V5FC                    | mg/dL | Free Cholesterol, VLDL-5 |
| V1PL                    | mg/dL | Phospholipids, VLDL-1    |
| V2PL                    | mg/dL | Phospholipids, VLDL-2    |
| V3PL                    | mg/dL | Phospholipids, VLDL-3    |
| V4PL                    | mg/dL | Phospholipids, VLDL-4    |
| V5PL                    | mg/dL | Phospholipids, VLDL-5    |
| <b>LDL subfractions</b> |       |                          |
| L1TG                    | mg/dL | Triglycerides, LDL-1     |
| L2TG                    | mg/dL | Triglycerides, LDL-2     |
| L3TG                    | mg/dL | Triglycerides, LDL-3     |
| L4TG                    | mg/dL | Triglycerides, LDL-4     |
| L5TG                    | mg/dL | Triglycerides, LDL-5     |
| L6TG                    | mg/dL | Triglycerides, LDL-6     |
| L1CH                    | mg/dL | Cholesterol, LDL-1       |
| L2CH                    | mg/dL | Cholesterol, LDL-2       |
| L3CH                    | mg/dL | Cholesterol, LDL-3       |
| L4CH                    | mg/dL | Cholesterol, LDL-4       |
| L5CH                    | mg/dL | Cholesterol, LDL-5       |
| L6CH                    | mg/dL | Cholesterol, LDL-6       |
| L1FC                    | mg/dL | Free Cholesterol, LDL-1  |
| L2FC                    | mg/dL | Free Cholesterol, LDL-2  |
| L3FC                    | mg/dL | Free Cholesterol, LDL-3  |
| L4FC                    | mg/dL | Free Cholesterol, LDL-4  |
| L5FC                    | mg/dL | Free Cholesterol, LDL-5  |
| L6FC                    | mg/dL | Free Cholesterol, LDL-6  |
| L1PL                    | mg/dL | Phospholipids, LDL-1     |
| L2PL                    | mg/dL | Phospholipids, LDL-2     |
| L3PL                    | mg/dL | Phospholipids, LDL-3     |
| L4PL                    | mg/dL | Phospholipids, LDL-4     |
| L5PL                    | mg/dL | Phospholipids, LDL-5     |
| L6PL                    | mg/dL | Phospholipids, LDL-6     |
| L1AB                    | mg/dL | Apo-B LDL-1              |
| L2AB                    | mg/dL | Apo-B LDL-2              |
| L3AB                    | mg/dL | Apo-B LDL-3              |
| L4AB                    | mg/dL | Apo-B LDL-4              |
| L5AB                    | mg/dL | Apo-B LDL-5              |
| L6AB                    | mg/dL | Apo-B LDL-6              |
| <b>HDL subfractions</b> |       |                          |
| H1TG                    | mg/dL | Triglycerides, HDL-1     |
| H2TG                    | mg/dL | Triglycerides, HDL-2     |
| H3TG                    | mg/dL | Triglycerides, HDL-3     |

|      |       |                         |
|------|-------|-------------------------|
| H4TG | mg/dL | Triglycerides, HDL-4    |
| H1CH | mg/dL | Cholesterol, HDL-1      |
| H2CH | mg/dL | Cholesterol, HDL-2      |
| H3CH | mg/dL | Cholesterol, HDL-3      |
| H4CH | mg/dL | Cholesterol, HDL-4      |
| H1FC | mg/dL | Free Cholesterol, HDL-1 |
| H2FC | mg/dL | Free Cholesterol, HDL-2 |
| H3FC | mg/dL | Free Cholesterol, HDL-3 |
| H4FC | mg/dL | Free Cholesterol, HDL-4 |
| H1PL | mg/dL | Phospholipids, HDL-1    |
| H2PL | mg/dL | Phospholipids, HDL-2    |
| H3PL | mg/dL | Phospholipids, HDL-3    |
| H4PL | mg/dL | Phospholipids, HDL-4    |
| H1A1 | mg/dL | Apo-A1, HDL-1           |
| H2A1 | mg/dL | Apo-A1, HDL-2           |
| H3A1 | mg/dL | Apo-A1, HDL-3           |
| H4A1 | mg/dL | Apo-A1, HDL-4           |
| H1A2 | mg/dL | Apo-A2, HDL-1           |
| H2A2 | mg/dL | Apo-A2, HDL-2           |
| H3A2 | mg/dL | Apo-A2, HDL-3           |
| H4A2 | mg/dL | Apo-A2, HDL-4           |

**Table S3.** LMM analysis of serum metabolites and lipoproteins in all patients (n = 24) using samples collected at inclusion as a reference.

| Metabolite    | Effect (time point) | Estimate | p-value (adj) |
|---------------|---------------------|----------|---------------|
| Phenylalanine | Post-laparoscopy    | 2.46     | < 0.001       |
| Glucose       | Post-laparoscopy    | 1.67     | < 0.001       |
| Valine        | Post-laparoscopy    | 1.29     | 0.002         |
| Lysine        | Post-laparoscopy    | 1.40     | 0.003         |
| Glutamine     | Post-laparoscopy    | 1.03     | 0.008         |
| Tyrosine      | Post-laparoscopy    | 1.56     | 0.012         |
| Lactate       | Post-laparoscopy    | 1.12     | 0.016         |
| Pyruvate      | Post-laparoscopy    | 1.54     | 0.037         |
| Formate       | Post-laparoscopy    | 1.76     | 0.038         |
| Phenylalanine | Post-surgery        | 2.91     | < 0.001       |
| Tyrosine      | Post-surgery        | 2.64     | < 0.001       |
| Creatine      | Post-surgery        | 1.83     | < 0.001       |
| Glucose       | Post-surgery        | 1.86     | < 0.001       |
| Pyruvate      | Post-surgery        | 1.89     | 0.035         |
| TPCH          | Post-surgery        | -1.60    | < 0.001       |
| TPA1          | Post-surgery        | -1.56    | < 0.001       |
| HDA1          | Post-surgery        | -1.49    | < 0.001       |
| L6FC          | Post-surgery        | -1.80    | < 0.001       |
| TPA2          | Post-surgery        | -1.59    | < 0.001       |
| LDPL          | Post-surgery        | -1.39    | < 0.001       |
| LDCH          | Post-surgery        | -1.36    | < 0.001       |
| HDA2          | Post-surgery        | -1.59    | < 0.001       |
| L5FC          | Post-surgery        | -1.42    | < 0.001       |
| HDCH          | Post-surgery        | -1.19    | < 0.001       |
| LDAB          | Post-surgery        | -1.32    | < 0.001       |
| LDPN          | Post-surgery        | -1.32    | < 0.001       |
| H3FC          | Post-surgery        | -1.38    | < 0.001       |
| L5PL          | Post-surgery        | -1.34    | < 0.001       |
| L5AB          | Post-surgery        | -1.28    | < 0.001       |
| L5PN          | Post-surgery        | -1.28    | < 0.001       |
| LDFC          | Post-surgery        | -1.17    | < 0.001       |
| L6PL          | Post-surgery        | -1.53    | < 0.001       |
| TBPN          | Post-surgery        | -1.27    | < 0.001       |
| TPAB          | Post-surgery        | -1.27    | < 0.001       |
| L6CH          | Post-surgery        | -1.46    | < 0.001       |
| L5CH          | Post-surgery        | -1.23    | < 0.001       |
| H2A2          | Post-surgery        | -1.65    | < 0.001       |
| H1CH          | Post-surgery        | -1.01    | < 0.001       |
| H4A1          | Post-surgery        | -1.12    | < 0.001       |
| H1FC          | Post-surgery        | -0.91    | < 0.001       |
| L5TG          | Post-surgery        | -1.13    | < 0.001       |
| V5CH          | Post-surgery        | 1.36     | < 0.001       |
| IDPL          | Post-surgery        | -1.25    | < 0.001       |
| L1FC          | Post-surgery        | -1.23    | < 0.001       |
| V5FC          | Post-surgery        | 1.57     | < 0.001       |
| H3A2          | Post-surgery        | -1.57    | < 0.001       |
| L6AB          | Post-surgery        | -1.31    | < 0.001       |
| L6PN          | Post-surgery        | -1.31    | < 0.001       |
| HDPL          | Post-surgery        | -1.07    | 0.001         |
| L4FC          | Post-surgery        | -1.06    | 0.002         |
| H2CH          | Post-surgery        | -0.93    | 0.003         |

|                 |                  |       |                  |
|-----------------|------------------|-------|------------------|
| H2FC            | Post-surgery     | -0.88 | 0.0034           |
| H1A1            | Post-surgery     | -0.83 | 0.0034           |
| H3CH            | Post-surgery     | -1.08 | 0.0040           |
| H1PL            | Post-surgery     | -0.81 | 0.0054           |
| H2A1            | Post-surgery     | -0.90 | 0.0129           |
| V5PL            | Post-surgery     | 1.10  | 0.0179           |
| H4FC            | Post-surgery     | -0.97 | 0.0179           |
| V5TG            | Post-surgery     | 1.08  | 0.0179           |
| H1A2            | Post-surgery     | -0.77 | 0.0255           |
| Glutamate       | Pre-chemotherapy | 1.27  | 0.040            |
| Alanine         | End of study     | 1.37  | 0.002            |
| Histidine       | End of study     | 1.05  | 0.004            |
| Creatinine      | End of study     | 0.55  | 0.027            |
| Methylglutarate | End of study     | 0.97  | 0.027            |
| TPCH            | End of study     | 1.01  | 0.0001 (< 0.001) |
| H3FC            | End of study     | 1.02  | 0.0005 (< 0.001) |
| TPA2            | End of study     | 1.04  | 0.0009 (< 0.001) |
| HDA2            | End of study     | 1.05  | 0.001            |
| H4A1            | End of study     | 0.88  | 0.002            |
| H4PL            | End of study     | 1.03  | 0.003            |
| H4A2            | End of study     | 0.83  | 0.003            |
| H4FC            | End of study     | 0.99  | 0.004            |
| HDFC            | End of study     | 0.70  | 0.007            |
| IDPL            | End of study     | 0.93  | 0.010            |
| H3A2            | End of study     | 1.13  | 0.022            |
| V1CH            | End of study     | 1.01  | 0.029            |
| V1TG            | End of study     | 0.94  | 0.030            |
| IDTG            | End of study     | 1.01  | 0.036            |
| H3A1            | End of study     | 0.97  | 0.036            |
| H4CH            | End of study     | 0.78  | 0.045            |

p-values adjusted according to Benjamini-Hochberg. Only significant findings are shown (p-values < 0.05).



**Table S4.** LMM analysis of patients where the subgroup long progression-free survival (reference group) values are tested in relation to short progression-free survival at each visit. Only time effects were significant in LMM; there were no group or time:group effects.

| Metabolite      | Effect (time point, group or time:group interaction) | Estimate (ref group) | p-value (adj) |
|-----------------|------------------------------------------------------|----------------------|---------------|
| Phenylalanine   | Post-laparoscopy                                     | 1.41                 | 0.000         |
| Dimethylsulfone | End of study                                         | 1.22                 | 0.001         |
| Histidine       | End of study                                         | 1.06                 | 0.046         |
| TPCH            | End of study                                         | 1.062                | 0.017         |

p-values adjusted according to Benjamini-Hochberg. Only significant findings are shown (p-values < 0.05).

**Table S5.** LMM analysis of patients where the subgroup Arm I (reference group) is tested in relation to Arm II at each visit. Only time effects were significant in LMM; there were no group or time:group effects.

| Metabolite    | Effect (time point, group or time:group interaction) | Estimate (ref group) | p-value (adj) |
|---------------|------------------------------------------------------|----------------------|---------------|
| Phenylalanine | Post-laparoscopy                                     | 1.39                 | 0.006         |

p-values adjusted according to Benjamini-Hochberg. Only significant findings are shown (p-values < 0.05).

## Supplementary Figures

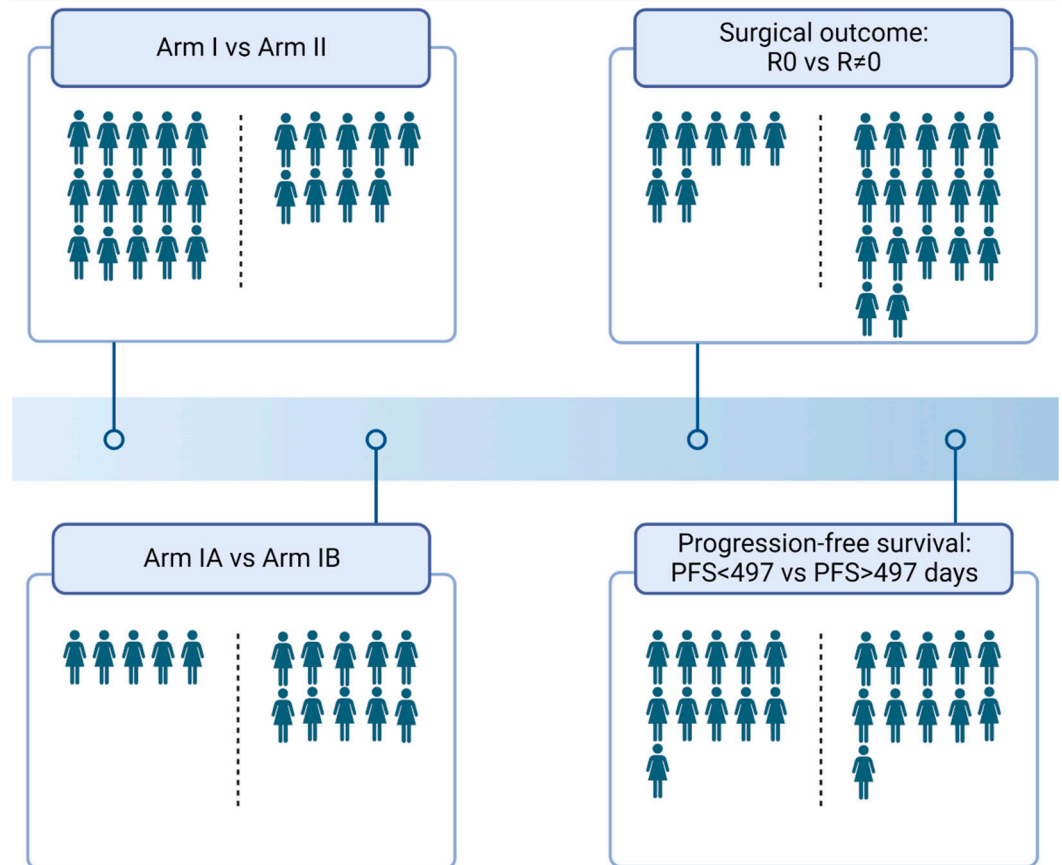

**Figure S1.** Study design and allocation of patients to different subgroups.

Arm I represents patients allocated to primary cytoreductive surgery after the diagnostic laparoscopy. Arm II consists of the patients allocated to neoadjuvant chemotherapy after the diagnostic laparoscopy. R0 represents patients in Arm I who obtained complete tumor resection at primary cytoreductive surgery. R≠0 represents patients in Arm I who did not obtain complete tumor resection at primary cytoreductive surgery and patients who underwent neoadjuvant chemotherapy (Arm II). Arm IA consists of patients who were allocated to PARP inhibitor treatment between the diagnostic laparoscopy and the cytoreductive surgery. Arm IB consists of patients who did not receive any additional treatment between the diagnostic laparoscopy and the primary cytoreductive surgery (standard-of-care treatment). Progression-free survival (PFS) was defined as the period from the date of trial inclusion to the diagnosis date of the first disease recurrence.

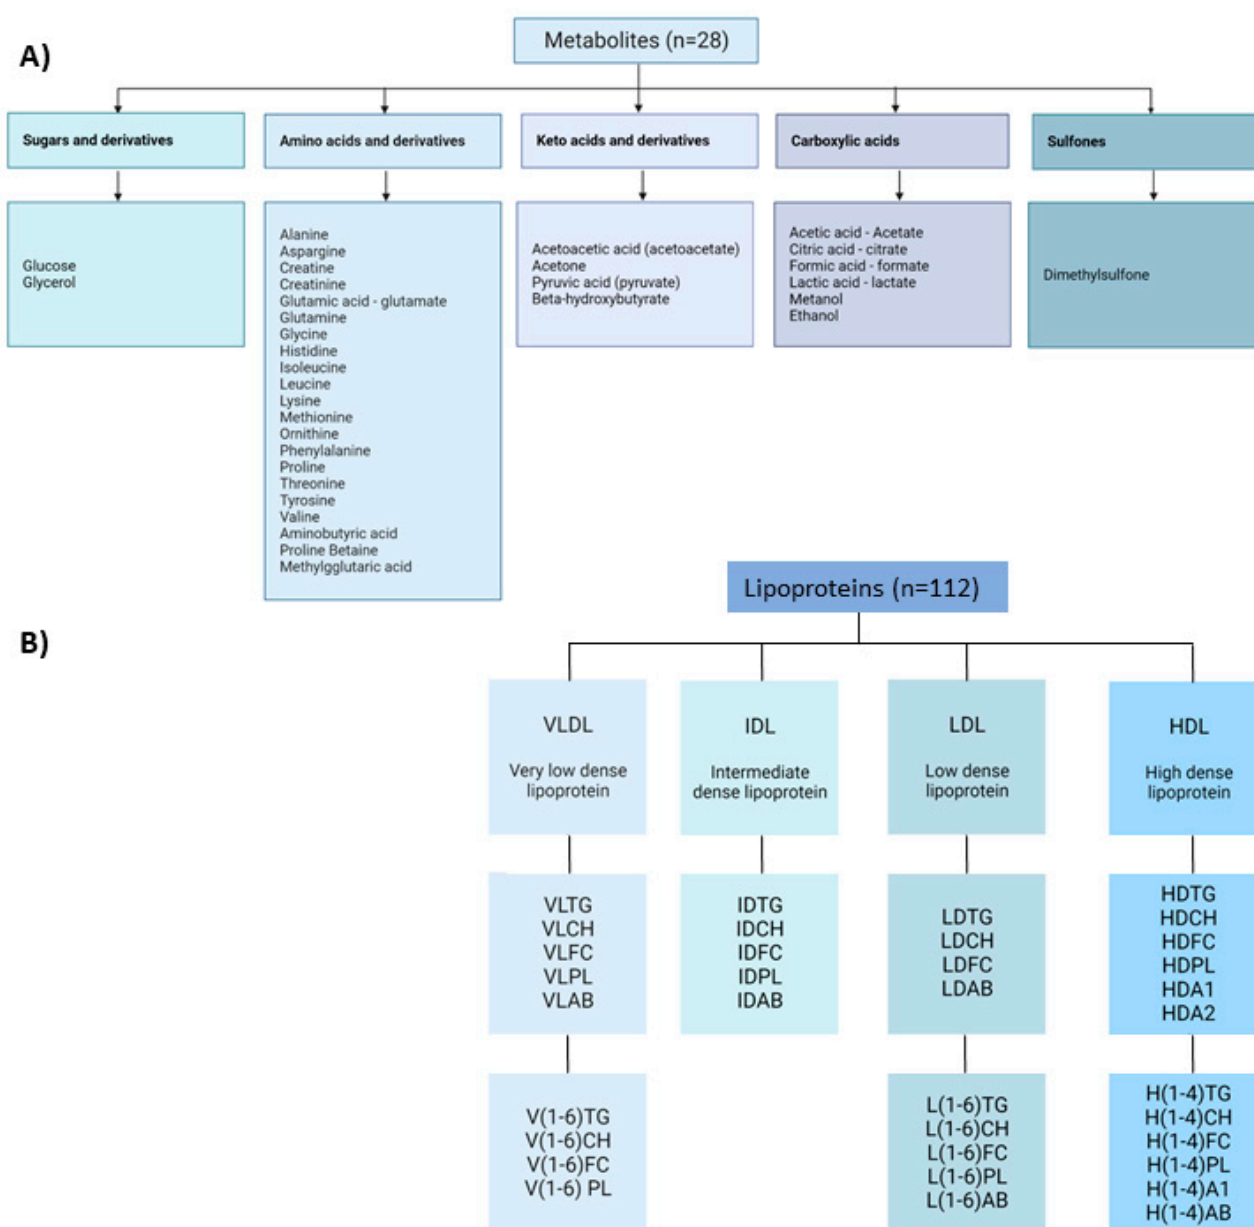

**Figure S2.** (A) Overview of metabolites (n = 28) and their subclasses. (B) Overview of lipoprotein subfractions. TG: triglycerides, CH: cholesterol, FC: free cholesterol, PL: phospholipids, AB: apolipoprotein B100, A1: apolipoprotein A1, A2: apolipoprotein A2.

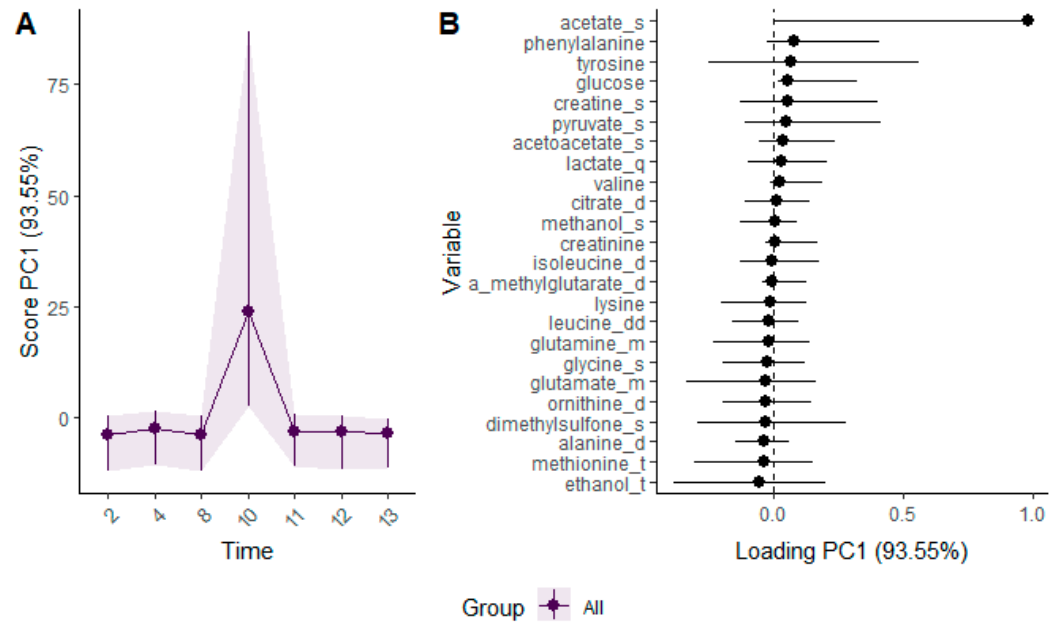

**Figure S3.** Metabolites—all values over time using ASCA-RM+. This analysis demonstrates a large increase in acetate at visit 10 (post-surgery) in one patient. Because it largely affects the model, we have imputed the single acetate value from this patient for the ASCA-RM+ plot in the figures in the main text.

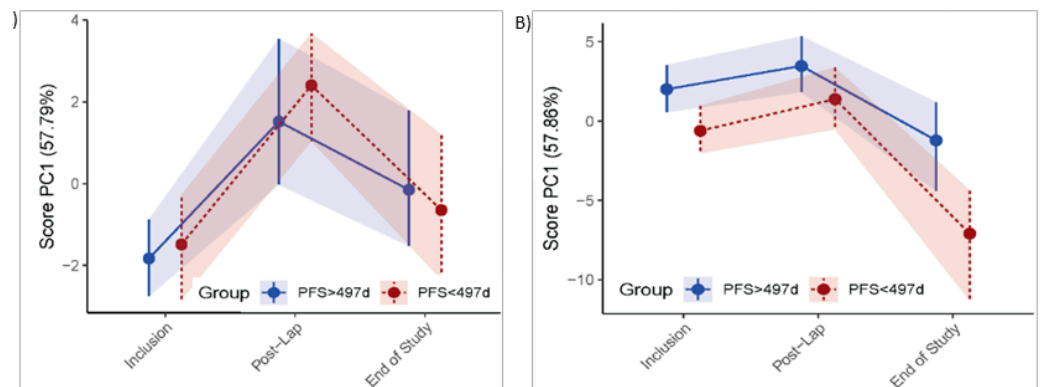

**Figure S4.** (A) Metabolites. Distribution in the two PFS groups. (B) Lipoproteins. Distribution in the two PFS groups.

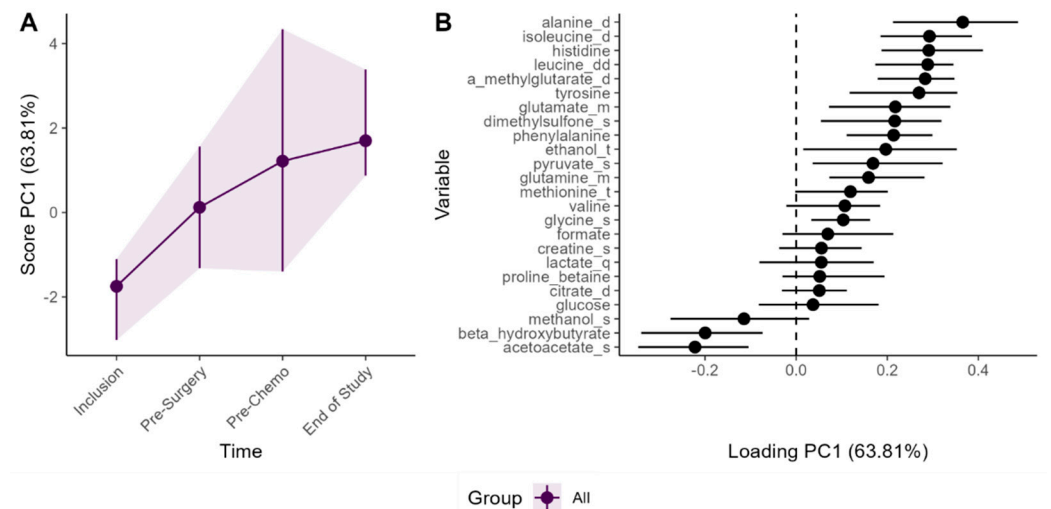

**Figure S5.** ASCA-RM+ analysis of metabolite changes during the treatment period. The ASCA-RM+ analysis of metabolite changes during the treatment period was performed without two visits: the post-laparoscopy and post-surgery visits.

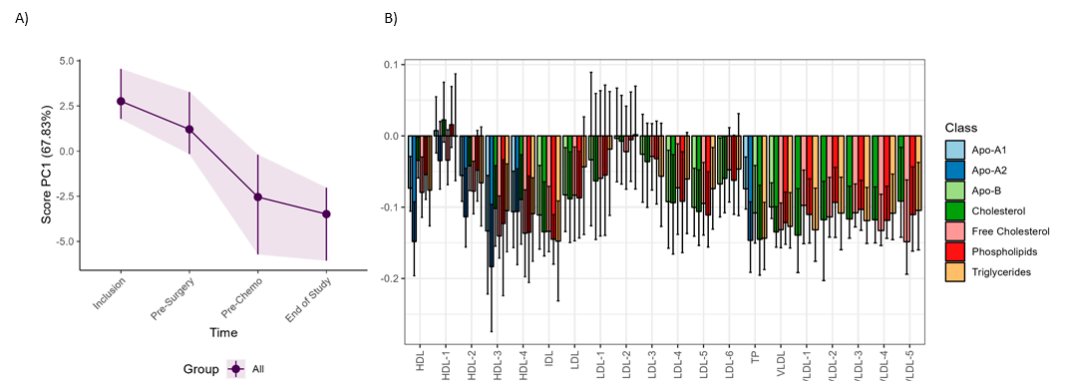

**Figure S6.** ASCA-RM+ analysis of lipoprotein changes during the treatment period. The ASCA-RM+ analysis of metabolite changes during the treatment period was performed excluding two visits: the post-laparoscopy and post-surgery visits.

Metabolite composition in patients who underwent surgery and chemotherapy (Arm I) vs. only chemotherapy (Arm II)

We performed an analysis of patients who had received neoadjuvant chemotherapy versus patients who had undergone primary surgery and received chemotherapy (last study visit) and found neither significant metabolic nor lipoprotein differences (**Figure S7**).

A subgroup analysis of the lipoprotein composition in patients with complete cytoreductive surgery vs. residual tumor or NACT treatment showed no significant differences (**Figure S7**). While phenylalanine, dimethylsulphone, creatinine, ethanol, glycine, and pyruvic acid increased in Arm II after the laparoscopy, the levels of  $\beta$ -hydroxybutyric acid and acetoacetic acid were decreased. The PLS-DA analysis did not identify significant differences in lipoproteins between the treatment arms after the operations. At the end-of-study visit, no differences could be demonstrated between these cohorts, neither for lipoproteins nor metabolite composition.

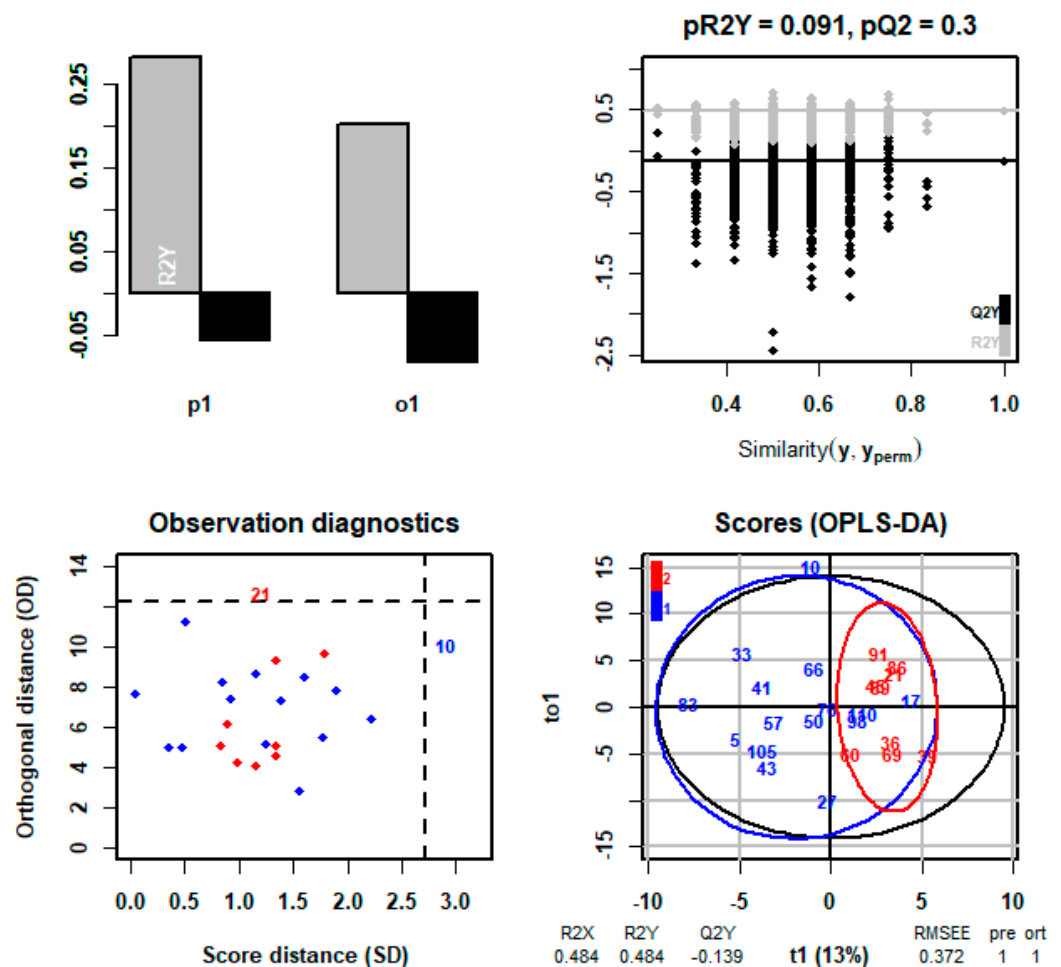

**Figure S7.** PLS-DA analysis performed for time of inclusion. The two trial arms were compared (Arm I vs. Arm II), and lipoproteins were applied as predictors.

*Metabolite composition in patients who obtained complete cytoreductive surgery (R0) vs. patients with residual tumor or neoadjuvant chemotherapy (R≠0)*

We explored metabolic and lipoprotein profiles between the two cohorts R0 (no residual tumor after surgery) and R≠0 (residual tumor after surgery) (**Figure S8**). This parameter was not associated with any robust differences in metabolite or lipoprotein composition. In the univariate analysis, we saw higher levels of glutamine, glutamate, and phenylalanine in patients who ended up with residual tumor, but these findings were not significant after multiple testing. In general, the LMM analysis demonstrated lower LDL-1, cholesterol, and free cholesterol at the end of treatment. Moreover, the ASCA-RM+ demonstrated the same tendency.

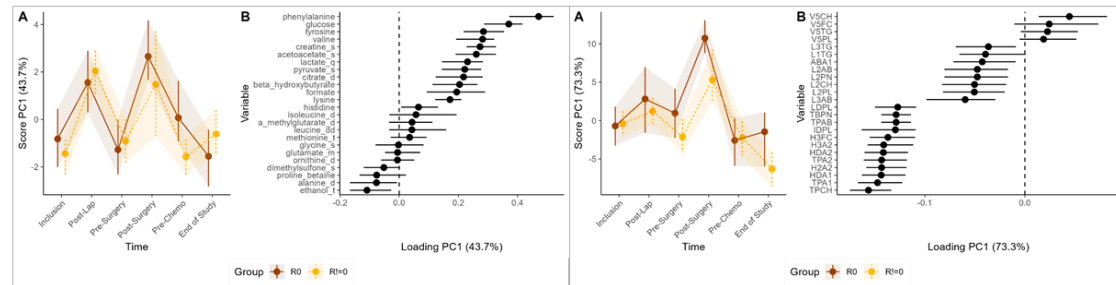

**Figure S8.** Subgroup analysis of patients who obtained complete cytoreductive surgery (brown) and those who obtained suboptimal cytoreductive surgery (yellow) with trajectory lines (A) and loading plots (B). To the left are metabolites and to the right lipoproteins. R0: successful surgery (n = 7); R≠0: residual tumor tissue after surgery (n = 16).

#### *Arm IA vs. Arm IB (the impact of PARP inhibition)*

Cohort IA received olaparib for 7–14 days prior to primary cytoreductive surgery. The number of patients tested for genomic or somatic BRCA mutations are outlined in Table S1. At inclusion, after olaparib treatment, and at the end of treatment, no differences in lipoprotein or metabolite composition were found (data not shown). Differences between the groups were found after the surgical procedures and after the cytoreductive surgery. Patients pre-treated with olaparib demonstrated increased phenylalanine, tyrosine, and glycine and decreased levels of 43 lipoproteins, including the main fractions cholesterol, Apo-A1, Apo-A2, LDL cholesterol, and HDL cholesterol. Samples taken before the initiation of chemotherapy showed decreased glutamate in the olaparib cohort and no differences in lipoproteins.

#### **Metabolites**

The ASCA-RM+ analyses fail to demonstrate an overall metabolic effect of treatment (A vs. B) (**Figure S9**). Arm IA has significantly lower phenylalanine ( $p < 0.001$ ), glucose ( $p = 0.027$ ), and lysine ( $p = 0.029$ ) after the laparoscopic procedure. After the cytoreductive surgery, Arm IA exhibits lower levels of phenylalanine and tyrosine ( $p < 0.001$  and  $0.009$ , respectively) and higher levels of glycine ( $p = 0.038$ ). Before the initiation of chemotherapy, glutamate is lower in the IA cohort ( $p = 0.001$ ). At the end of study, the metabolite composition between these subgroups shows no differences.

#### *Principal component analysis (PCA) plot of metabolites with lines between values for each patient*

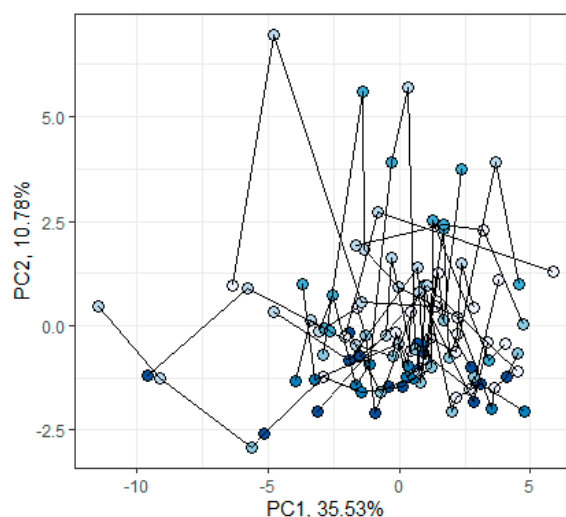

**Figure S9.** Metabolites from all patients, all visits included. The lines follow each individual patient during the study period.



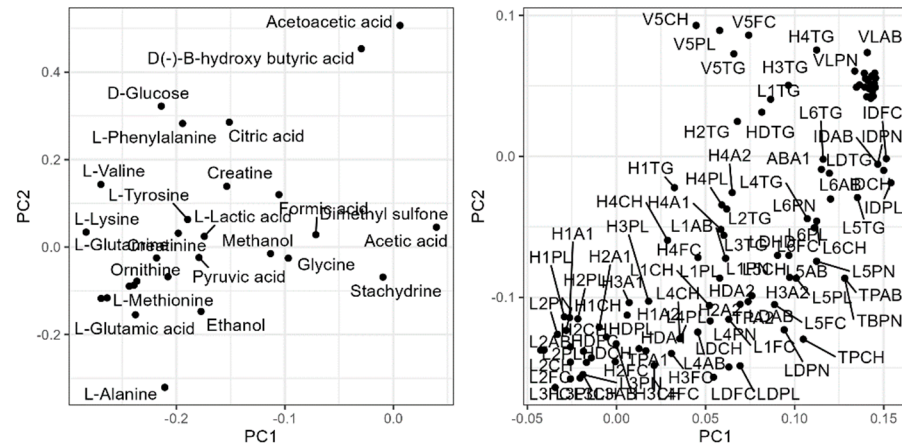

**Figure S10.** Loadings from the principal component analysis (PCA) plots in Figures 2A and 2B, showing the influence of the metabolites and lipoprotein variables on the PC scores.
